# Supplementary material
Source: PubMed Central journal article supplement (PMC5411371)

# Online Resource 1

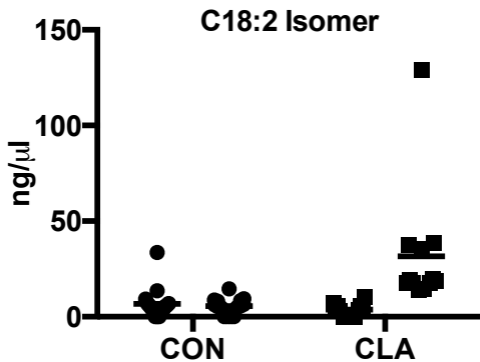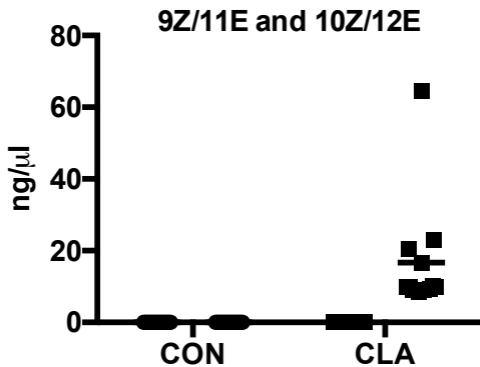

Supplement: 11357_2017_9968_MOESM1_ESM.pdf [file 11357_2017_9968_MOESM1_ESM.pdf]

## Online Resource 2

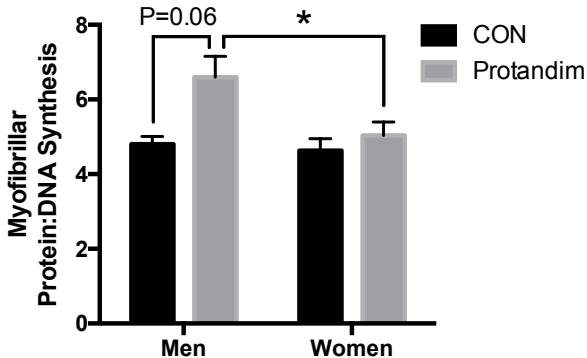

Supplement: 11357_2017_9968_MOESM2_ESM.pdf [file 11357_2017_9968_MOESM2_ESM.pdf]
